# Supplementary material
Source: PubMed Central journal article supplement (PMC3248542)
Supplement: 1115203108_pnas.201115203SI.pdf [file 1115203108_pnas.201115203SI.pdf]

# Supporting Information

Fitzgerald et al. 10.1073/pnas.1115203108

## SI Materials and Methods

**PCR and Sequencing.** All PCR amplifications were performed using Platinum Taq polymerase (Invitrogen). PCR product purity and quantity was determined by gel electrophoresis. PCR products were purified by ethanol precipitation. Sequencing reactions were performed using ABI BigDye Terminator version 3.1 (Applied Biosystems) in forward and reverse directions using the appropriate volume of purified PCR product as determined by gel quantification postpurification. Purification of sequencing products was by ethanol precipitation. Samples were sequenced using an Applied Biosystems 3730 genetic analyzer. Genomic regions containing exons coding for functionally important regions of the respective proteins were sequenced (Table S3). *Adh1* exon DNA sequence coding for the catalytic and coenzyme binding domains was obtained along with surrounding intron sequence. Exon sequence coding for the catalytic domain and surrounding intron sequence was obtained for *betaine aldehyde dehydrogenase 1* (*BADH1*), *BADH2*, *ABC1037*, and *Rpg1*.

**Correction of Proportion of Samples Possessing Predominant Sequence.** Consider a population of  $B$  samples, in which  $A_x$  individuals possess the predominant (DNA or encoded amino acid) sequence within a sequence length of  $x$  bp. The expected number of samples ( $A_y$ ) possessing the predominant sequence in a sequence length of  $y$  that is double the length of the initial region  $x$  was calculated using the following method, where total sample number =  $B$ , length of sequence assessed in base pairs =  $x$ , samples possessing predominant sequence from  $x$  length of sequence =  $A_x$ , proportion of samples possessing predominant sequence from  $x$  length of sequence =  $A_x/B$ , corrected length of sequence in base pairs =  $y$  (in this example,  $y = 2x$ ), samples possessing predominant sequence from  $y$  length of sequence =  $A_y$ , and proportion of samples possessing predominant sequence from  $y$  length of sequence =  $A_y/B$ .

In correcting for sequence length, it is assumed that the likelihood of discovery of samples with predominant sequence is the same per base pair in the original length of sequence ( $x$ ) and the corrected length of sequence ( $y$ ). If an additional length of sequence in the subset of samples ( $A_x$ ) possessing the predominant sequence is assessed, one will discover that a proportion of this subset of samples possesses the predominant sequence in this additional region of sequence, whereas a proportion does not. If the additional region is equal in length to the region initially assessed (i.e., additional sequence length =  $x$ ), one will find that  $A_x/B \times A_x$  samples possess the predominant sequence over the complete length of sequence ( $y = 2x$ ) or (Eq. S1)

$$A_y = A_x(A_x/B). \quad [\text{S1}]$$

This equation can be extended to  $y = 3x$  (Eq. S2),

$$A_y = A_x(A_x/B) \times A_x/B = A_x(A_x/B)^2, \quad [\text{S2}]$$

or  $y = 4x$  (Eq. S3),

$$A_y = A_x(A_x/B)^2 \times A_x/B = A_x(A_x/B)^3. \quad [\text{S3}]$$

Conceptually, this equation is easiest to understand when one thinks in terms of increasing lengths of  $y$ , which are integer multiples of  $x$ ; however, a generalized equation can be derived for any value of  $y \geq 0$ , where (Eq. S4)

$$A_y = A_x(A_x/B)^{(y/x-1)}. \quad [\text{S4}]$$

This equation yields values of  $A_y$ , which decrease as  $y/x$  increases, approaching zero as  $y/x$  approaches infinity, and increase as  $y/x$  decreases, approaching  $B$  as  $y/x$  approaches zero.

**Weeping Ricegrass Chloroplast Genome Sequencing.** DNA samples from the two most environmentally differentiated sites, site 29 (site A) and site 37 (site B), were selected for massively parallel sequencing. Key demographic characteristics of sites A and B were similar: both were small populations in terms of area ( $\sim 20 \text{ m}^2$ ) and number of individuals ( $\sim 100$ ), and both were 0.5–1 km from the nearest discrete population. Ongoing gene flow within the (maternally inherited) cp-genome, facilitated by seed dispersal, from other populations is unlikely at either site A or site B because of the small area encompassing these populations and their geographic isolation.

Eleven individuals were sampled per site from which DNA was extracted and quantified by nanodrop spectroscopy (NanoDrop) and gel visualization. Two pools of DNA corresponding to each site were created by mixing equimolar amounts of DNA derived each individual at each site; each sample contributed 270 ng DNA, giving a total of 2.7  $\mu\text{g}/\text{pool}$ . Each of these pooled samples was processed as described in the work by Nock et al. (1) and sequenced on an Illumina GAII Platform (Illumina).

Sequence data were trimmed on CLC genomics workbench ([www.clcbio.com](http://www.clcbio.com)), where reads with a quality score of less than 0.01 were discarded; paired-end reads were trimmed to a minimum of 30 bp, and single-end reads were trimmed to a minimum of 20 bp in length. Reads from the two sites were then assembled to a *Microlaena stipoides* chloroplast sequence (GenBank accession no. GU592211). Reference assembly was completed with the following parameters: mismatch cost of two, insertion and deletion costs of three, length fraction of 0.8, and similarity of 0.8. Minimum distance for paired-end reads was set at 180, with a maximum distance of 340, and criteria were set to ignore nonspecific matches and vote for ambiguous calls. SNP detection parameters were assigned: window length of 21, maximum number of gaps or mismatches of two, and minimum quality score of 30 for SNP site and surrounding bases. Minimum coverage was initially set as 1 $\times$ , and minimum variant frequency was 1%. Intra-individual diversity was estimated by analysis of whole-chloroplast genome sequence data derived from an individual plant.

Secondary analysis of the CLC output was conducted using Microsoft Excel 2007, where SNPs at any reference position were eliminated from the analysis if the number of variants equaled one. A minimum sequence coverage of 88 $\times$  and a minimum frequency of 5% were required for an SNP to be considered real and incorporated into analysis.

**DNA Extraction.** Leaf tissue was collected from individuals, and DNA extraction was performed using an MWG Theonyx Liquid Performer robot (MWG Biotech) with a modified MagAttract 96 DNA Plant Protocol (Qiagen) that included two Buffer RPW washes and three ethanol washes at steps 6 and 8, respectively.

**Identification of SNPs and Genotypes.** Forward and reverse sequences were aligned and trimmed using Sequencher (Gene Codes). Polymorphic sites were identified in Sequencher by comparison of sequence chromatograms. Heterozygous individuals were identified from either mismatches to the consensus or ambiguous base calls and were confirmed by viewing chromatogram peaks. Arlequin version 3.0 software (1) was used to assist with grouping sequences for each locus into genotypes.





**Table S1. Distribution of nonsynonymous exon diversity  $G_eA$  for wild-barley defense loci within populations**

| Population     | <i>Rpg1</i> | ABC1037 |
|----------------|-------------|---------|
| Nahal Oren SFS | 0.38 (0.25) | 0.22    |
| Nahal Oren NFS | 0.28 (0.50) | 0.48    |
| Mt. Meron      | 0.00 (0.33) | 0.28    |
| Maalot         | 0.00 (0.08) | 0.00    |
| Sede Boqer     | 0.67 (0.50) | 0.29    |
| Wadi Qilt      | 0.45 (0.25) | 0.41    |
| Tabigha TR     | 0.50 (0.91) | 0.62    |
| Tabigha B      | 0.00 (0.91) | 0.48    |

Values in parentheses in the *Rpg1* column are proportions of samples within a population from which *Rpg1* could be amplified.

**Table S2.  $\chi^2$  comparison of corrected values (*Materials and Methods*) for predominant genotype (PG) vs. not predominant genotype (NPG) among wild barley defense loci**

|              | <i>Isa</i>        | <i>Rpg1</i> | ABC1037           | <i>Adh1</i> | <i>BADH1</i> | <i>BADH2</i> |
|--------------|-------------------|-------------|-------------------|-------------|--------------|--------------|
| <i>Isa</i>   | X                 | 14.5*       | 8.50 <sup>†</sup> | 74.8*       | 63*          | 11.9*        |
| <i>Rpg1</i>  | 14.5*             | X           | 2.40              | 22.5*       | 12.7*        | 1.20         |
| ABC1037      | 8.50 <sup>†</sup> | 2.40        | X                 | 40.4*       | 30.4*        | 0.30         |
| <i>Adh1</i>  |                   |             |                   | X           | 3.00         | 34.7*        |
| <i>BADH1</i> |                   |             |                   | 3.00        | X            | 25.1*        |
| <i>BADH2</i> |                   |             |                   | 34.7*       | 25.1*        | X            |

Red shading indicates comparison among biotic defense loci. Blue shading indicates comparison among abiotic defense loci. Purple shading indicates comparison between biotic and abiotic defense loci. \* $P < 0.001$ ; <sup>†</sup> $P < 0.01$ . X indicates a comparison of a gene to itself (not applicable).

**Table S3.  $\chi^2$  comparison of corrected values (*Materials and Methods*) for predominant amino acid sequence (PAA) vs. not predominant amino acid sequence (NPAA) among wild barley defense loci**

|              | <i>Isa</i>        | <i>Rpg1</i> | ABC1037 | <i>Adh1</i>       | <i>BADH1</i>      | <i>BADH2</i>      |
|--------------|-------------------|-------------|---------|-------------------|-------------------|-------------------|
| <i>Isa</i>   | X                 | 2.21        | 2.02    | 7.49*             | 7.25*             | 6.94*             |
| <i>Rpg1</i>  | 2.21              | X           | 0.07    | 15.8 <sup>†</sup> | 15.3 <sup>†</sup> | 14.6 <sup>†</sup> |
| ABC1037      | 2.02 <sup>†</sup> | 0.07        | X       | 14.3 <sup>†</sup> | 13.9 <sup>†</sup> | 13.3 <sup>†</sup> |
| <i>Adh1</i>  |                   |             |         | X                 | 0.00              | 0.00              |
| <i>BADH1</i> |                   |             |         | 0.00              | X                 | 0.00              |
| <i>BADH2</i> |                   |             |         | 0.00              | 0.00              | X                 |

Red shading indicates comparison among biotic defense loci. Blue shading indicates comparison among abiotic defense loci. Purple shading indicates comparison between biotic and abiotic defense loci. \* $P < 0.01$ ; <sup>†</sup> $P < 0.001$ . X indicates a comparison of a gene to itself (not applicable).

**Table S4. Origin, sample size (*N*), and ecogeographic variables for each of the eight localities from which wild barley samples were assessed in this study**

| Locality       | <i>N</i> | Long (E) | Lat (N) | Alt (m) | Tm (°C) | Rn (mm) |
|----------------|----------|----------|---------|---------|---------|---------|
| Nahal Oren SFS | 12       | 35.02    | 32.43   | 75      | 19      | 690     |
| Nahal Oren NFS | 12       | 35.02    | 32.43   | 75      | 19      | 690     |
| Mt. Meron      | 12       | 35.4     | 33.05   | 1,150   | 14      | 1,010   |
| Maalot         | 12       | 35.27    | 33      | 500     | 17      | 785     |
| Sede Boqer     | 12       | 34.78    | 30.87   | 450     | 19      | 91      |
| Wadi Qilt      | 12       | 35.38    | 31.83   | 50      | 23      | 170     |
| Tabigha TR     | 11       | 35.53    | 32.9    | 0       | 24      | 436     |
| Tabigha B      | 11       | 35.53    | 32.9    | 0       | 24      | 436     |

Alt, altitude; Lat (N), latitude north; Long (E), longitude east; Rn, mean annual rainfall; Tm, mean annual temperature. Modified from Nevo et al. (1). SFS, south-facing slope; NFS, north-facing slope; TR, terra rosa soil; B, basalt soil.

1. Nevo E, et al. (1985) *Genetica* 67:209–222.

**Table S5. Geographic location and description of sample sites from which live weeping ricegrass were collected**

| Site number | Location name       | Sample site elevation (m) | Latitude (S) | Longitude (E) | Degrees east of Melbourne | Land use [natural (N) or agricultural/urban (A/U)] | Soil pH | Soil type                | Brief description of sample site location         |
|-------------|---------------------|---------------------------|--------------|---------------|---------------------------|----------------------------------------------------|---------|--------------------------|---------------------------------------------------|
| 1           | Studley Park        | 45                        | 37.799       | 145.01        | 0.01                      | A/U                                                | 5.5     | Loam                     | River edge, shaded                                |
| 2           | Koonung Creek       | 58                        | 37.798       | 145.12        | 0.12                      | A/U                                                | 5       | Loam                     | Up from creek (4 m), shaded                       |
| 3           | Croyden             | 108                       | 37.81        | 145.27        | 0.27                      | A/U                                                | 5       | Clay loam                | Partly shaded, not mowed                          |
| 4           | Mt Evelyn           | 149                       | 37.795       | 145.38        | 0.38                      | A/U                                                | 5.5     | Loam silt                | Shaded, not mowed                                 |
| 5           | Launching Place A   | 153                       | 37.78        | 145.58        | 0.58                      | A/U                                                | 5       | Clay loam                | Heavily shaded, closely mowed                     |
| 31          | Launching Place B   | 153                       | 37.78        | 145.58        | 0.58                      | A/U                                                | 5       | Clay                     | Shaded, not mowed garden verge                    |
| 6           | Slaty Creek         | 151                       | 37.825       | 145.66        | 0.66                      | A/U                                                | 5       | Silt                     | Grazed pasture                                    |
| 7           | Powelltown          | 199                       | 37.864       | 145.75        | 0.75                      | A/U                                                | 5       | Shallow loam over clay   | Mowed ridge in car park                           |
| 8           | La Trobe River Edge | 358                       | 37.87        | 145.8         | 0.8                       | N                                                  | 5.5     | Clay loam                | Heavily shaded roadside, not mowed                |
| 32          | La Trobe River Edge | 358                       | 37.87        | 145.8         | 0.8                       | N                                                  | 4.5     | Clay loam                | Heavily shaded roadside, not mowed                |
| 9           | Noojee 9            | 317                       | 37.9         | 145.98        | 0.98                      | N                                                  | 3.5     | Clay                     | Open, sloping area, not mowed                     |
| 33          | Noojee 33           | 237                       | 37.897       | 146.01        | 1.01                      | A/U                                                | 5.5     | Clay loam                | Lawn, shaded                                      |
| 10          | Icy Creek B         | 423                       | 37.885       | 146.08        | 1.08                      | A/U                                                | 5       | Shallow clay over rock   | Roadside gutter, not mowed                        |
| 34          | Icy Creek Edge A    | 501                       | 37.866       | 146.12        | 1.12                      | N                                                  | 4.5     | Clay                     | Forest verge, not shaded, not mowed               |
| 11          | Tanjil Bren         | 702                       | 37.824       | 146.18        | 1.18                      | N                                                  | 4.5     | Loam over clay           | Partially shaded, mowed amenity                   |
| 35          | Mt Baw Baw A        | 882                       | 37.854       | 146.24        | 1.24                      | N                                                  | 4.5     | Clay with organic matter | Roadside, thick bush coverage                     |
| 37 (B)      | Mt Baw Baw B        | 882                       | 37.852       | 146.24        | 1.24                      | N                                                  | 4.5     | Clay with organic matter | Roadside, thick bush coverage                     |
| 13          | Buddy's Track       | 800                       | 37.871       | 146.25        | 1.25                      | N                                                  | 4       | Organic layer over clay  | Edge of track, full sun                           |
| 14          | Palmer              | 754                       | 37.911       | 146.3         | 1.3                       | N                                                  | 4.5     | Loam over clay           | Track edge, not mowed, thick bush                 |
| 36          | Mt Erica Road       | 610                       | 37.893       | 146.38        | 1.38                      | N                                                  | 4       | Loam                     | On side of track                                  |
| 15          | Tylers Junction     | 370                       | 37.925       | 146.38        | 1.38                      | N                                                  | 4.5     | Silt over clay           | Rarely mowed near creek edge                      |
| 17          | Coopers Creek       | 432                       | 37.971       | 146.4         | 1.4                       | N                                                  | 4.5     | Clay                     | Edge of road, not mowed                           |
| 18          | Rawson              | 497                       | 37.956       | 146.4         | 1.4                       | A/U                                                | 5       | Loam with organics       | Mowed lawn, under shade                           |
| 16          | Walhalla            | 419                       | 37.929       | 146.45        | 1.45                      | A/U                                                | 3.5     | Clay                     | Roadside, no soil depth on rock                   |
| 19          | Cowwarr Road        | 403                       | 38.021       | 146.46        | 1.46                      | A/U                                                | 5       | Clay                     | Edge of road, not mowed                           |
| 20          | Mt Lookout Area     | 397                       | 38.003       | 146.6         | 1.6                       | N                                                  | 4       | Clay                     | Barren, open, not shaded                          |
| 21          | Cowwarr Weir        | 75                        | 37.999       | 146.66        | 1.66                      | A/U                                                | 4       | Loam                     | Passive recreation area, open sun, regular mowing |
| 22          | Heyfield            | 47                        | 37.985       | 146.78        | 1.78                      | A/U                                                | 5       | Sandy clay               | Flood plain, infrequent mowing                    |
| 23          | Tinamba             | 38                        | 37.96        | 146.89        | 1.89                      | A/U                                                | 5.5     | Silt over clay           | Not mowed passive roadside area                   |
| 24          | Maffra              | 26                        | 37.967       | 146.97        | 1.97                      | A/U                                                | 5       | Clay                     | Not mowed passive amenity area                    |
| 25          | Stratford           | 17                        | 37.971       | 147.08        | 2.08                      | A/U                                                | 5       | Sandy loam               | Not mowed roadside                                |
| 26          | Perry Bridge        | 25                        | 38.002       | 147.23        | 2.23                      | A/U                                                | 5.5     | Loamy sand               | Mowed roadside, may be for hay                    |
| 27          | Meerlieu            | 19                        | 38.001       | 147.39        | 2.39                      | A/U                                                | 5       | Organic layer over sand  | Edge of swamp, mosquitoes                         |
| 28          | Goon Nure           | 40                        | 37.952       | 147.52        | 2.52                      | A/U                                                | 5       | Sand                     | Reserve, no grazing or mowing                     |
| 29 (A)      | Paynesville         | 3                         | 37.907       | 147.72        | 2.72                      | A/U                                                | 5.5     | Sand                     | Rarely mowed sunny amenity                        |

**Table S6. Accessions of wild-barley and weeping ricegrass DNA samples as indexed within the Australian Plant DNA Bank (<https://www.dnabank.com.au/>)**

| <i>Hordeum spontaneum</i> |              | <i>Hordeum spontaneum</i> |              | <i>Microlaena stipoides</i> |              | <i>Microlaena stipoides</i> |              |
|---------------------------|--------------|---------------------------|--------------|-----------------------------|--------------|-----------------------------|--------------|
| Sample                    | Accession    | Sample                    | Accession    | Sample                      | Accession    | Sample                      | Accession    |
| NFS-2                     | AC05-1005444 | TB-55                     | AC05-1005530 | 41,670                      | AC11-1008273 | 41,717                      | AC11-1008320 |
| NFS-3                     | AC05-1005445 | TB-56                     | AC05-1005531 | 41,671                      | AC11-1008274 | 41,718                      | AC11-1008321 |
| NFS-4                     | AC05-1005446 | TB-57                     | AC05-1005532 | 41,672                      | AC11-1008275 | 41,719                      | AC11-1008322 |
| NFS-5                     | AC05-1005447 | TB-58                     | AC05-1005533 | 41,673                      | AC11-1008276 | 41,720                      | AC11-1008323 |
| NFS-6                     | AC05-1005448 | TB-60                     | AC05-1005534 | 41,674                      | AC11-1008277 | 41,721                      | AC11-1008324 |
| NFS-7                     | AC05-1005449 | TB-61                     | AC05-1005535 | 41,675                      | AC11-1008278 | 41,722                      | AC11-1008325 |
| NFS-8                     | AC05-1005450 | TB-62                     | AC05-1005536 | 41,676                      | AC11-1008279 | 41,723                      | AC11-1008326 |
| NFS-9                     | AC05-1005451 | TB-63                     | AC05-1005537 | 41,677                      | AC11-1008280 | 41,724                      | AC11-1008327 |
| NFS-10                    | AC05-1005452 | TB-67                     | AC05-1005538 | 41,678                      | AC11-1008281 | 41,725                      | AC11-1008328 |
| NFS-11                    | AC05-1005453 | TB-70                     | AC05-1005539 | 41,679                      | AC11-1008282 | 41,726                      | AC11-1008329 |
| NFS-12                    | AC05-1005454 | TB-76                     | AC05-1005540 | 41,680                      | AC11-1008283 | 41,727                      | AC11-1008330 |
| NFS-13                    | AC05-1005455 | SB-1                      | AC05-1005550 | 41,681                      | AC11-1008284 | 41,728                      | AC11-1008331 |
| SFS-1                     | AC05-1005467 | SB-2                      | AC05-1005551 | 41,682                      | AC11-1008285 | 41,729                      | AC11-1008332 |
| SFS-7                     | AC05-1005469 | SB-3                      | AC05-1005552 | 41,683                      | AC11-1008286 | 41,730                      | AC11-1008333 |
| SFS-10                    | AC05-1005470 | SB-4                      | AC05-1005553 | 41,684                      | AC11-1008287 | 41,731                      | AC11-1008334 |
| SFS-13                    | AC05-1005471 | SB-7                      | AC05-1005554 | 41,685                      | AC11-1008288 | 41,732                      | AC11-1008335 |
| SFS-16                    | AC05-1005472 | SB-13                     | AC05-1005557 | 41,686                      | AC11-1008289 | 41,733                      | AC11-1008336 |
| SFS-17                    | AC05-1005473 | SB-36                     | AC05-1005563 | 41,687                      | AC11-1008290 | 41,734                      | AC11-1008337 |
| SFS-18                    | AC05-1005474 | SB-37                     | AC05-1005564 | 41,688                      | AC11-1008291 | 41,735                      | AC11-1008338 |
| SFS-19                    | AC05-1005475 | SB-38                     | AC05-1005565 | 41,689                      | AC11-1008292 | 41,736                      | AC11-1008339 |
| SFS-20                    | AC05-1005476 | SB-39                     | AC05-1005566 | 41,690                      | AC11-1008293 | 41,737                      | AC11-1008340 |
| SFS-21                    | AC05-1005477 | SB-40                     | AC05-1005567 | 41,691                      | AC11-1008294 | 41,738                      | AC11-1008341 |
| SFS-22                    | AC05-1005478 | SB-45                     | AC05-1005568 | 41,692                      | AC11-1008295 | 41,739                      | AC11-1008342 |
| SFS-23                    | AC05-1005479 | Maalot-1                  | AC05-1005569 | 41,693                      | AC11-1008296 | 41,740                      | AC11-1008343 |
| WQ-4                      | AC05-1005492 | Maalot-3                  | AC05-1005570 | 41,694                      | AC11-1008297 | 41,741                      | AC11-1008344 |
| WQ-8                      | AC05-1005493 | Maalot-4                  | AC05-1005571 | 41,695                      | AC11-1008298 | 41,742                      | AC11-1008345 |
| WQ-19                     | AC05-1005494 | Maalot-5                  | AC05-1005572 | 41,696                      | AC11-1008299 | 41,743                      | AC11-1008346 |
| WQ-24                     | AC05-1005495 | Maalot-6                  | AC05-1005573 | 41,697                      | AC11-1008300 | 41,744                      | AC11-1008347 |
| WQ-41                     | AC05-1005498 | Maalot-8                  | AC05-1005574 | 41,698                      | AC11-1008301 | 41,745                      | AC11-1008348 |
| WQ-42                     | AC05-1005499 | Maalot-9                  | AC05-1005575 | 41,699                      | AC11-1008302 | 41,746                      | AC11-1008349 |
| WQ-53                     | AC05-1005500 | Maalot-10                 | AC05-1005576 | 41,700                      | AC11-1008303 | 41,747                      | AC11-1008350 |
| WQ-58                     | AC05-1005501 | Maalot-11                 | AC05-1005577 | 41,701                      | AC11-1008304 | 41,748                      | AC11-1008351 |
| WQ-61                     | AC05-1005502 | Maalot-14                 | AC05-1005578 | 41,702                      | AC11-1008305 | 41,749                      | AC11-1008352 |
| WQ-62                     | AC05-1005503 | Maalot-15                 | AC05-1005579 | 41,703                      | AC11-1008306 | 41,750                      | AC11-1008353 |
| WQ-64                     | AC05-1005504 | Maalot-18                 | AC05-1005580 | 41,704                      | AC11-1008307 | 41,751                      | AC11-1008354 |
| WQ-65                     | AC05-1005505 | Meron-3                   | AC05-1005595 | 41,705                      | AC11-1008308 | 41,752                      | AC11-1008355 |
| TTR-18                    | AC05-1005517 | Meron-5                   | AC05-1005596 | 41,706                      | AC11-1008309 | 41,753                      | AC11-1008356 |
| TTR-19                    | AC05-1005518 | Meron-9                   | AC05-1005597 | 41,707                      | AC11-1008310 | 41,754                      | AC11-1008357 |
| TTR-20                    | AC05-1005519 | Meron-10                  | AC05-1005598 | 41,708                      | AC11-1008311 | 41,755                      | AC11-1008358 |
| TTR-23                    | AC05-1005520 | Meron-12                  | AC05-1005599 | 41,709                      | AC11-1008312 | 41,756                      | AC11-1008359 |
| TTR-28                    | AC05-1005521 | Meron-16                  | AC05-1005600 | 41,710                      | AC11-1008313 | 41,757                      | AC11-1008360 |
| TTR-29                    | AC05-1005522 | Meron-17                  | AC05-1005601 | 41,711                      | AC11-1008314 | 41,758                      | AC11-1008361 |
| TTR-33                    | AC05-1005524 | Meron-18                  | AC05-1005602 | 41,712                      | AC11-1008315 | 41,759                      | AC11-1008362 |
| TTR-34                    | AC05-1005525 | Meron-19                  | AC05-1005603 | 41,713                      | AC11-1008316 | 41,760                      | AC11-1008363 |
| TTR-40                    | AC05-1005527 | Meron-21                  | AC05-1005604 | 41,714                      | AC11-1008317 | 41,761                      | AC11-1008364 |
| TTR-41                    | AC05-1005528 | Meron-26                  | AC05-1005605 | 41,715                      | AC11-1008318 | 41,762                      | AC11-1008365 |
| TTR-45                    | AC05-1005529 | Meron-27                  | AC05-1005606 | 41,716                      | AC11-1008319 | 41,763                      | AC11-1008366 |
|                           |              |                           |              |                             |              | 41,764                      | AC11-1008367 |
|                           |              |                           |              |                             |              | 41,765                      | AC11-1008368 |

Table S7. Details of loci analyzed

| Gene         | Samples | PCR/sequencing primers                                                                                                                                                                 | Exon (bp) | Intron (bp) | Highly functionally significant exon region assayed                                                                        | Ref. |
|--------------|---------|----------------------------------------------------------------------------------------------------------------------------------------------------------------------------------------|-----------|-------------|----------------------------------------------------------------------------------------------------------------------------|------|
| <i>Mslsa</i> | 96      | F TCCCCCTCATACTCCTCTCC;<br>R CACGAGTCCCTGCACGACAC                                                                                                                                      | 351       | 0           | <i>Mslsa</i> region corresponding to 150–500 bp <i>Isa</i> cDNA region (coding for BASI/AMY2 interaction domain) (Fig. S3) | 1, 2 |
| <i>Rpg1</i>  | 44*     | F CATAACGGTGGTTGGTTACTG;<br>R GATTGGACTCCACGCATTTT                                                                                                                                     | 380       | 211         | Full exon 5, full exon 6 (pk1 catalytic domain)                                                                            | 3    |
| ABC1037      | 91      | F ATTCAGTCTGGGTGTCATAATCTTG;<br>R AAACAAATCACTCTTTCTATCACAC                                                                                                                            | 289       | 109         | Full exon 7, partial exon 8 (pk1 catalytic domain)                                                                         | 4    |
| <i>Adh1</i>  | 94      | F <b>CATDOM</b> CGTGACTGATGTTGCCCTGGTGAC;<br>F <b>COENZYME</b> TATTTGTATGATTTAGGCTGCAGAA;<br>R <b>CATDOM</b> GAGATAAGCTGTAGCCATAATAAGC;<br>R <b>COENZYME</b> GTCAACTCCGCCATTTGTCATGTCA | 304       | 170         | Full exon 4 (catalytic domain); full exon 6, partial exon 7 (coenzyme binding domain)                                      | 5    |
| <i>BADH1</i> | 91      | F CCATGTGGATAAGATCGCTTTTACA;<br>R CGACAAGTCTATCCAAAAATCGCTC                                                                                                                            | 166       | 359         | Full exon 8, full exon 9 (catalytic domain)                                                                                | 6    |
| <i>BADH2</i> | 87      | F CATCAGGTGCTTAAACATTGTGAC;<br>R GGATAAGAAGACGAGATGTCGCACT                                                                                                                             | 134       | 467         | Full exon 7, full exon 8 (catalytic domain)                                                                                | 7    |

Gene name, number of samples for which sequence was obtained, primers used for PCR and sequencing reactions, length of exon and intron sequences obtained, and highly functionally significant exon sequences targeted are shown. AMY2,  $\alpha$ -amylase 2; BASI, bifunctional amylase/subtilisin inhibitor; *Mslsa*, *Microlaena stipoides Isa*. Boldface letters indicate primer directions (F, forward; R, reverse). For *Adh1*, "CATDOM" indicates primers targeting the catalytic domain and "COENZYME" indicates primers targeting the coenzyme binding domain.

\*PCR was performed on 94 samples using the *Rpg1* primers, and product was amplified from 44 of 94 samples (Results).

- Bønsager BC, et al. (2005) Mutational analysis of target enzyme recognition of the  $\beta$ -trefoil fold barley  $\alpha$ -amylase/subtilisin inhibitor. *J Biol Chem* 280:14855–14864.
- Micheelsen PO, et al. (2008) Structural and mutational analyses of the interaction between the barley  $\alpha$ -amylase/subtilisin inhibitor and the subtilisin savinase reveal a novel mode of inhibition. *J Mol Biol* 380:681–690.
- Brueggeman R, et al. (2002) The barley stem rust-resistance gene *Rpg1* is a novel disease-resistance gene with homology to receptor kinases. *Proc Natl Acad Sci USA* 99:9328–9333.
- Brueggeman R, Drader T, Kleinhofs A (2006) The barley serine/threonine kinase gene *Rpg1* providing resistance to stem rust belongs to a gene family with five other members encoding kinase domains. *Theor Appl Genet* 113:1147–1158.
- Strommer J (2011) The plant ADH gene family. *Plant J* 66:128–142.
- Tylichová M, et al. (2010) Structural and functional characterization of plant aminoaldehyde dehydrogenase from *Pisum sativum* with a broad specificity for natural and synthetic aminoaldehydes. *J Mol Biol* 396:870–882.
- Chen S, et al. (2008) Badh2, encoding betaine aldehyde dehydrogenase, inhibits the biosynthesis of 2-acetyl-1-pyrroline, a major component in rice fragrance. *Plant Cell* 20:1850–1861.
